# Supplementary material for: Enhanced preferential CO oxidation on Zn2SnO4 supported Au nanoparticles: support and H2 effects
Source: Royal Society of Chemistry journal article supplement (doi:10.1039/c6ta05232k), 2016-01-01
Supplement: c6ta05232k1.pdf [file c6ta05232k1.pdf]

## **Enhanced Preferential CO Oxidation on Zn<sub>2</sub>SnO<sub>4</sub> Supported Au Nanoparticles: Support and H<sub>2</sub> Effects**

A. Leelavathi,<sup>a</sup> N. Ravishankar<sup>b</sup> and Giridhar Madras<sup>c\*</sup>

a. Centre for Nanoscience and Engineering, Indian Institute of Science, Bangalore-560012, India.

b. Materials Research Centre, Indian Institute of Science, Bangalore-560012, India.

c. Department of Chemical Engineering, Indian Institute of Science, Bangalore-560012, India.

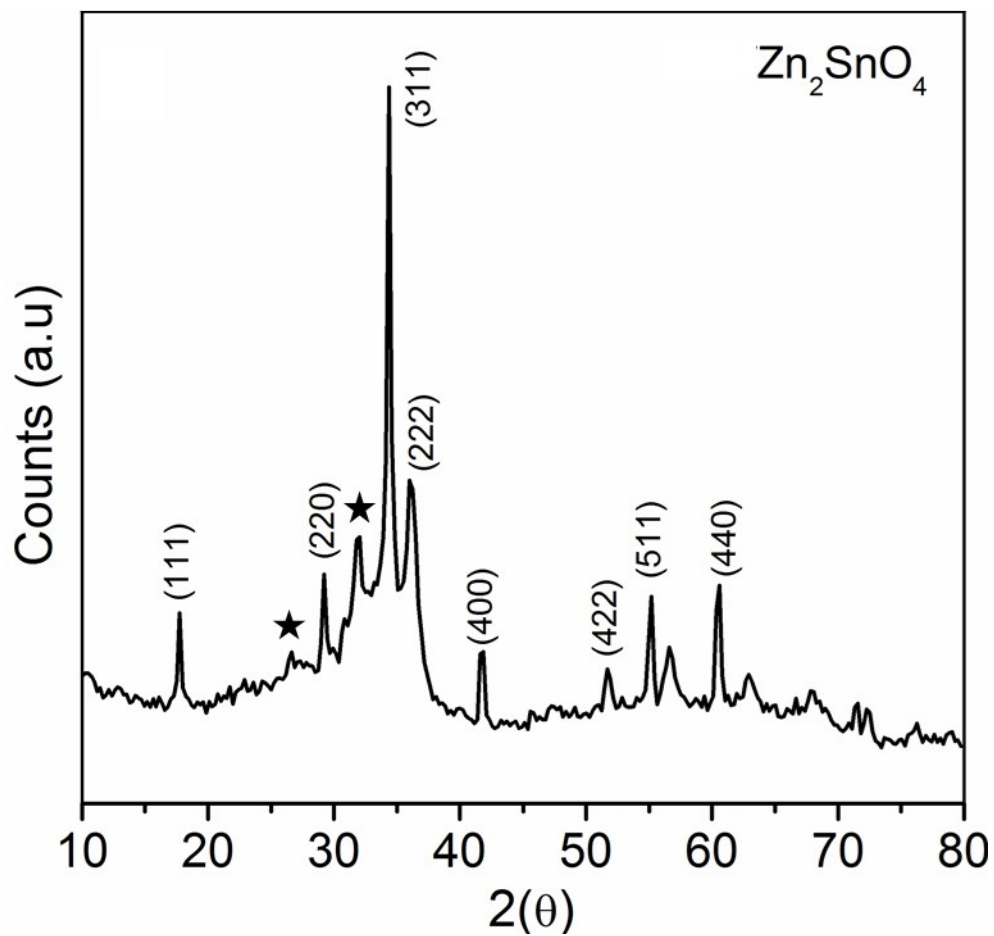

**Fig. S1** XRD pattern of Zn<sub>2</sub>SnO<sub>4</sub> inverse spinel structure, marked peaks corresponds to impurity phase

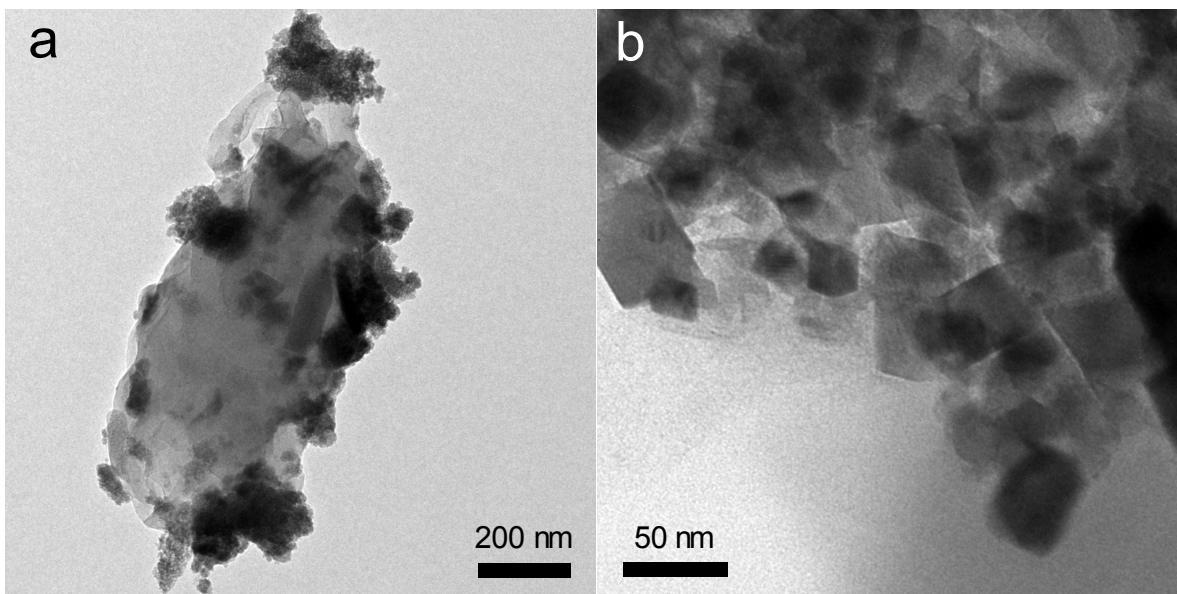

**Fig. S2** Bright field TEM micrographs of combustion synthesized  $\text{Zn}_2\text{SnO}_4$  at different magnifications.

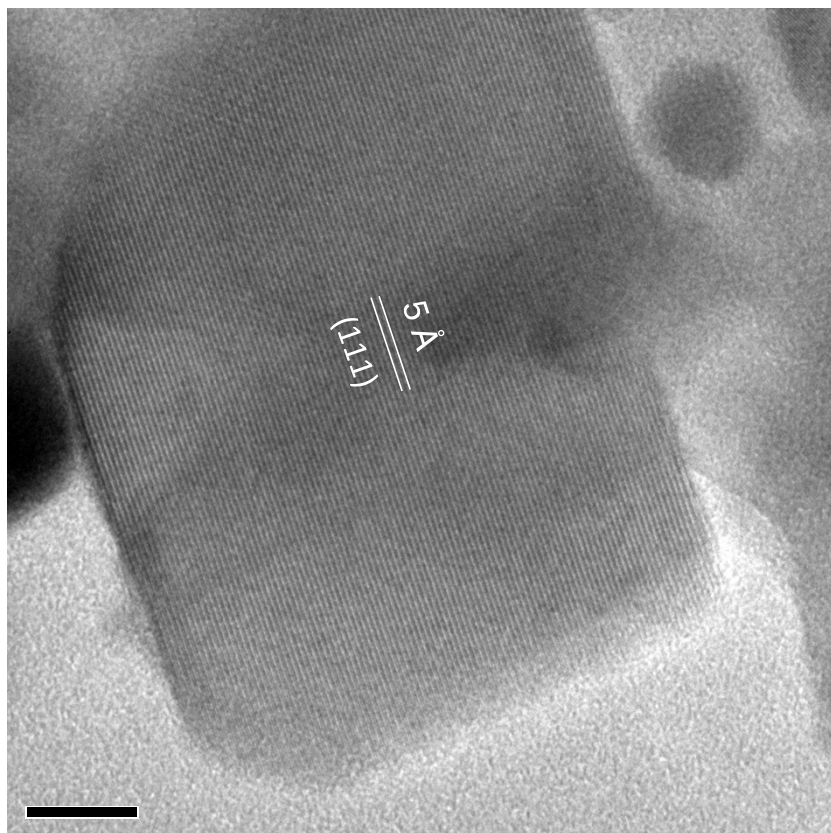

**Fig. S3** High resolution TEM image of Zn<sub>2</sub>SnO<sub>4</sub>, illustrated d-spacing corresponds to crystallographic (111) plane of Zn<sub>2</sub>SnO<sub>4</sub>.

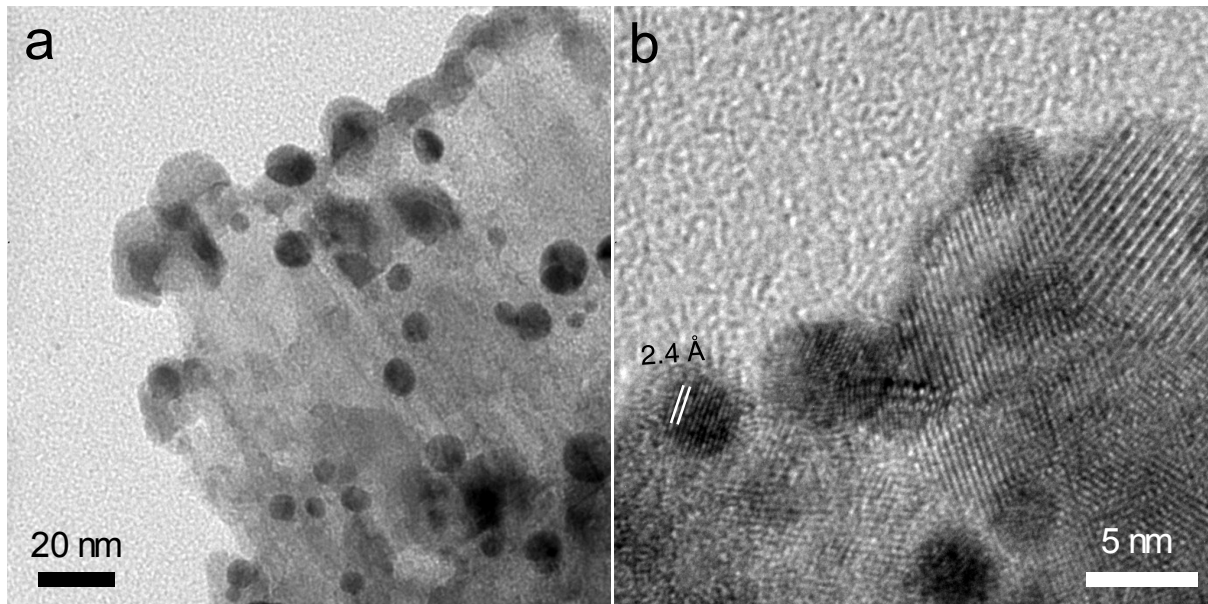

**Fig. S4** (a) Bright field and (b) corresponding high-resolution TEM micrographs of Au/Zn<sub>2</sub>SnO<sub>4</sub> the marked lattice spacing corresponds to Au (111) plane.

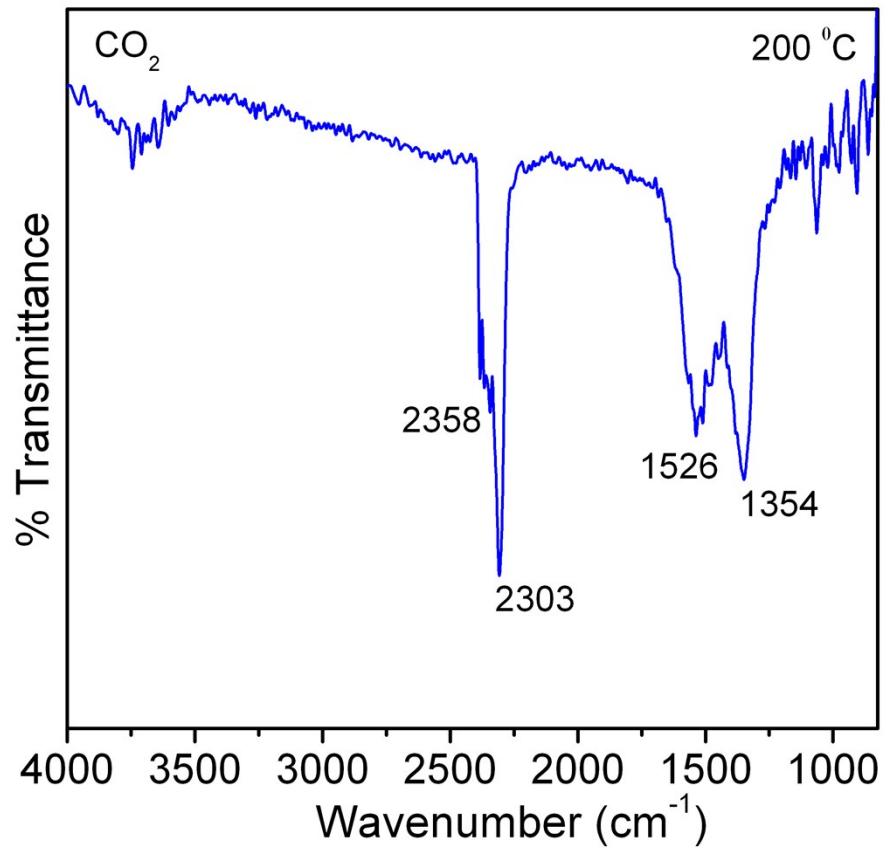

**Fig. S5** DRIFT spectra recorded during flow of CO<sub>2</sub> on Zn<sub>2</sub>SnO<sub>4</sub> at 200 °C. Carbonates signals along with gases CO<sub>2</sub> peaks are observed.

| <b>Au/Zn<sub>2</sub>SnO<sub>4</sub></b> | <b>Relative Intensity Ratio of Au</b> |                        |                        |
|-----------------------------------------|---------------------------------------|------------------------|------------------------|
|                                         | <b>Au<sup>0</sup></b>                 | <b>Au<sup>1+</sup></b> | <b>Au<sup>3+</sup></b> |
| As-synthesized                          | 1                                     | 0.34                   | 0.29                   |
| After COX                               | 1                                     | 0.30                   | 0.15                   |
| After PROX                              | 1                                     | 0.27                   | 0.09                   |
| After CO TPR                            | 1                                     | 0                      | 0                      |

**Table S1** XPS relative intensity ratios of Au oxidation state (AU 4f) in Au/Zn<sub>2</sub>SnO<sub>4</sub> at different experimental conditions.

| <b>Au/Zn<sub>2</sub>SnO<sub>4</sub></b> | <b>Zn-carbonates<br/>(Binding Energy in eV)</b> | <b>Zn-V<sub>o</sub> (Binding<br/>Energy in eV)</b> | <b>Sn-V<sub>o</sub> and carbonates<br/>(Binding Energy in eV)</b> |
|-----------------------------------------|-------------------------------------------------|----------------------------------------------------|-------------------------------------------------------------------|
| As-synthesized                          | 93.7                                            | 91.2                                               | 89.8                                                              |
|                                         | 92.6                                            | 88.7                                               | 87.0                                                              |
| After COX                               | 94.1                                            | 91.2                                               | 90.0                                                              |
|                                         | 92.7                                            | 88.7                                               | 87.3                                                              |
| After PROX                              | 94.5                                            | 91.3                                               | 88.9                                                              |
|                                         | 92.7                                            | 88.7                                               | 87.4                                                              |
| After CO TPR                            | 94.2                                            | 91.2                                               | 89.3                                                              |
|                                         | 92.8                                            | 89.0                                               | 87.2                                                              |

**Table S2** XPS peak position of Zn 3p and Sn 4p in Zn/Au<sub>2</sub>SnO<sub>4</sub> catalyst treated at different experimental conditions.

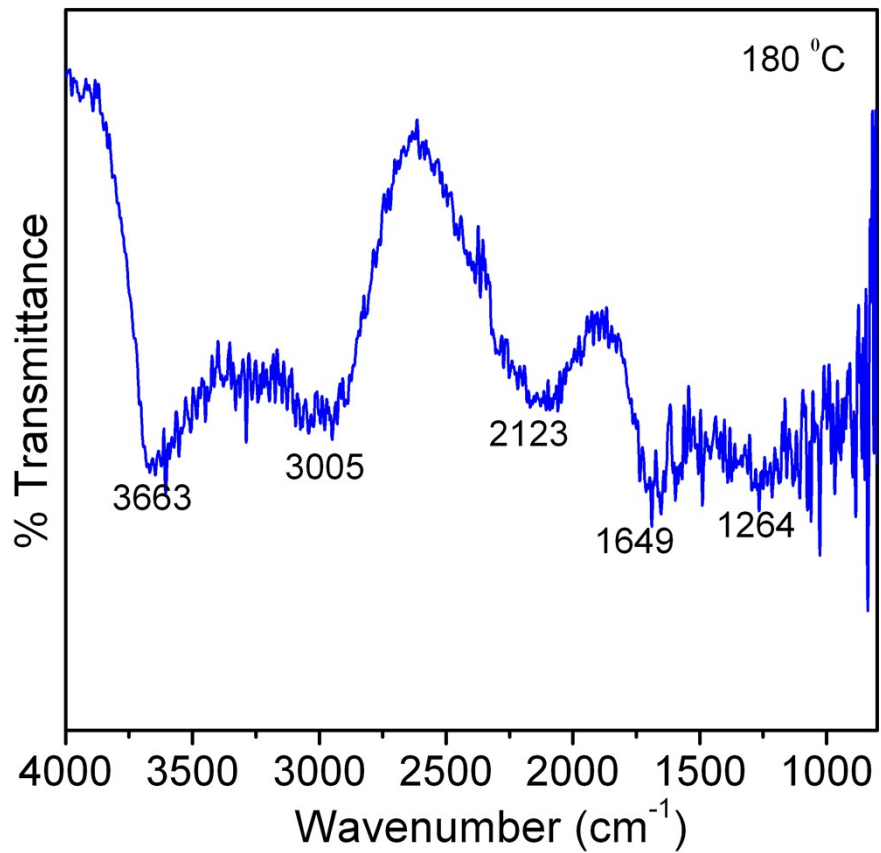

**Fig. S6** DRIFT spectra recorded during PROX at 180 °C for Au/Zn<sub>2</sub>SnO<sub>4</sub>. Prominent, HOH vibrations are observed.
